# Supplementary material for: Neutralization of Zika virus by germline-like human monoclonal antibodies targeting cryptic epitopes on envelope domain III
Source: PubMed Central journal article supplement (PMC5658772; doi:10.1038/emi.2017.79), 2017-10-11
Supplement: emi201779x1.pdf [file emi201779x1.pdf]

## **Supplemental Information**

### **Neutralization of Zika virus by germline-like human monoclonal antibodies targeting cryptic epitopes on envelope domain III**

Yanling Wu, Shun Li, Lanying Du, Chunyu Wang, Peng Zou, Binbin Hong,  
Mengjiao Yuan, Xiaonan Ren, Wanbo Tai, Yu Kong, Chen Zhou, Lu Lu, Xiaohui  
Zhou, Shibo Jiang, Tianlei Ying

## FIGURE LEGENDS

**Figure S1:** Immunogenetic analysis of the heavy and light chain variable regions of m303 and m304 using the IMGT tool.

**Figure S2:** Immunogenetic analysis of the m301 similar sequences from the IgM repertoire from healthy human neonates and adults. Sequence ID started with CB representing sequences derived from the library of the neonates, and started with HH representing sequences derived from the library of the adults.

(a): Amino acid sequences of HCDR3s that were found similar to that of m301 from the deep sequencing analysis of IgM libraries derived from 33 healthy human adults and 10 neonates, which were analyzed by Clustal W2.

(b): Germline-rooted circular phylogenetic tree of m301 like antibody sequences found in IgM libraries derived from 33 healthy human adults and 10 newborn babies. The phylogenetic tree was constructed by the Neighbor-Joining method. The numbers labeled on the branch in red representing the probability to gain the topological structure, only the probabilities more than 50% were labeled that means the structures were more reliable.

**Figure S3:** Immunogenetic analysis of the m302 similar sequences from the IgM repertoire from healthy human neonates and adults.

(a): Amino acid sequences of HCDR3s that were found similar to that of m302 from the deep sequencing analysis of IgM libraries derived from the libraries of the healthy human neonates and adults.

(b): Germline-rooted circular phylogenetic tree of m302 like antibody sequences found in IgM libraries derived from the libraries of the healthy human neonates and adults.

**Figure S4:** Immunogenetic analysis of the m304 similar sequences from the IgM repertoire from healthy human neonates and adults.

(a): Amino acid sequences of HCDR3s that were found similar to that of m304 from the deep sequencing analysis of IgM libraries derived from the libraries of the healthy human neonates and adults.

(b): Germline-rooted circular phylogenetic tree of m304 like antibody sequences found in IgM libraries derived from the libraries of the healthy human neonates and adults.

**Figure S5:** Immunogenetic analysis of the m303 similar sequences from the IgM repertoire from healthy human neonates and adults.

(a): Amino acid sequences of HCDR3s that were found similar to that of m303 from the deep sequencing analysis of IgM libraries derived from the libraries of the healthy human neonates and adults.

(b): Germline-rooted circular phylogenetic tree of m303 like antibody sequences found in IgM libraries derived from the libraries of the healthy human neonates and adults.

**Figure S6:** Alignment of E protein DIII of ZIKV isolated circulating in 2015-2016 ZIKV outbreak.

**Figure S1**

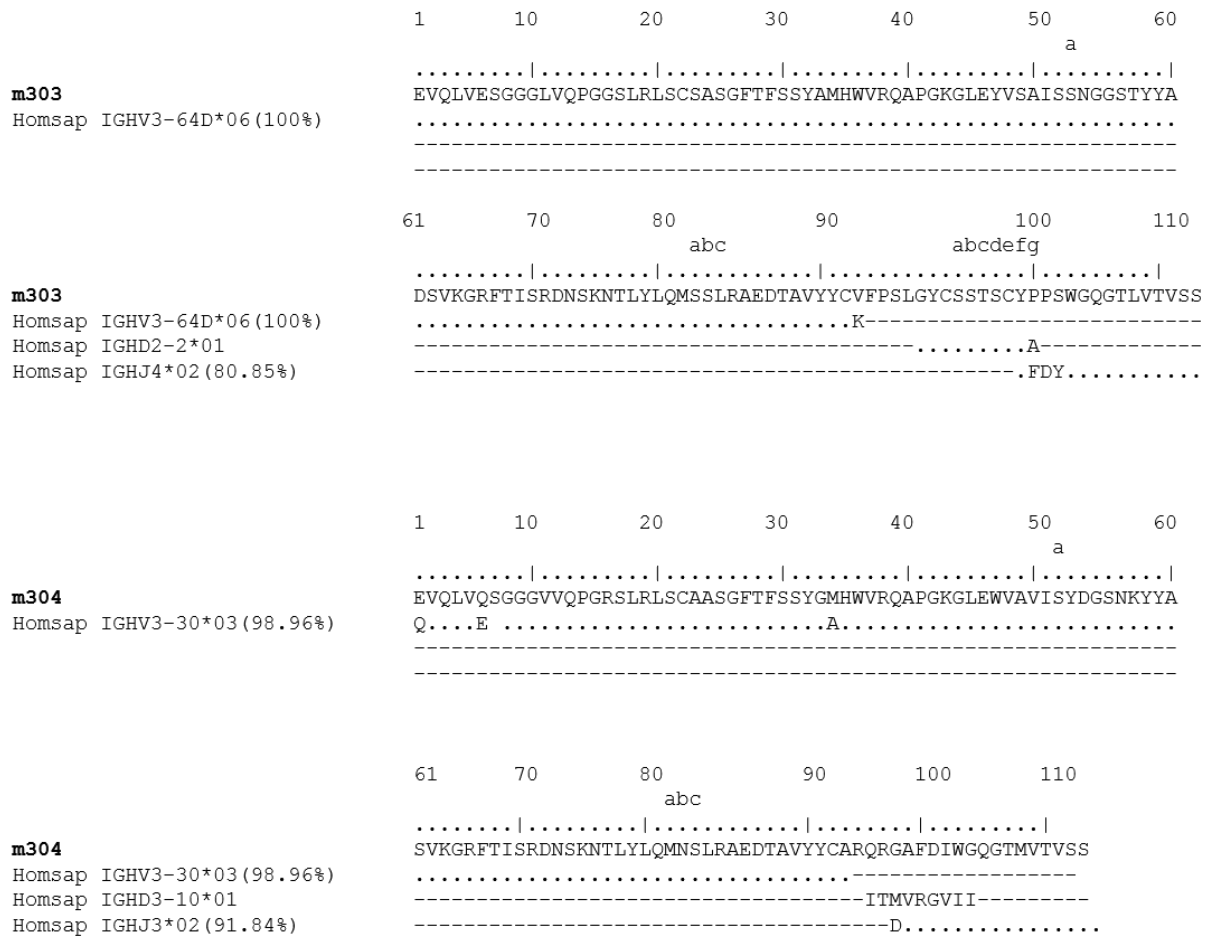

Figure S2

|                            |             |
|----------------------------|-------------|
| M301                       | AKEVGRSYFDY |
| CB_M301_sm_521251801014941 | AKESGSYYFDY |
| CB_M301_sm_512162673729430 | AKEVRSYYPDY |
| CB_M301_sm_52206679634125  | AKEVGATYFDY |
| CB_M301_sm_52209324713178  | AKEMAGWYFDY |
| CB_M301_sm_51204744616893  | AKEHSGSYFDY |
| CB_M301_sm_512021468110124 | AKESGGSYFDY |
| CB_M301_sm_512091228642337 | AKEVPLGYFDY |
| HH_M301_sm_121012706238222 | AKSIVEGYFDY |
| HH_M301_sm_12214977046451  | AKDANGGCPDY |
| CB_M301_sm_511107272728024 | AKETEGGYFDY |
| CB_M301_sm_521193122337273 | AKERNGDYFDY |
| CB_M301_sm_512211981614555 | AKEGLGYFPDY |
| CB_M301_sm_512042919322467 | AKELLGAYFDY |
| CB_M301_sm_522261242822995 | AKERLQYYFDY |
| CB_M301_sm_511202546913236 | AKEAEDYYFDY |
| CB_M301_sm_51123417813341  | AKEAHGYFPDY |
| CB_M301_sm_511161095729483 | AKEGQWYFPDY |
| CB_M301_sm_512262328726090 | AKEGQLVYFDY |
| CB_M301_sm_51117232722344  | AKEGNWHYFDY |
| HH_M301_sm_322252190720709 | AKVRDSSLFDY |
| HH_M301_sm_311092372325931 | AKESPTVAFDY |
| HH_M301_sm_321211820330081 | AKDSRRWSFDY |
| HH_M301_sm_12105493910053  | AKDLNWEFDY  |
| HH_M301_sm_32227325438679  | AKDRNLGFPDY |
| HH_M301_sm_111112631117368 | AKDRRTVFPDY |
| HH_M301_sm_311123002535972 | AKGSSWYFPDY |
| HH_M301_sm_322121011512269 | AKDSYDYPFDY |
| HH_M301_sm_121122956938662 | AKSKQAIPFDY |
| HH_M301_sm_3122699736994   | AKNGAYNFPDY |
| HH_M301_sm_32214300259702  | AKVGVNHPDY  |
| HH_M301_sm_11109244853231  | AKDGHSNFPDY |
| HH_M301_sm_121123142613781 | AKRGYSYFPDY |
|                            | **      *** |

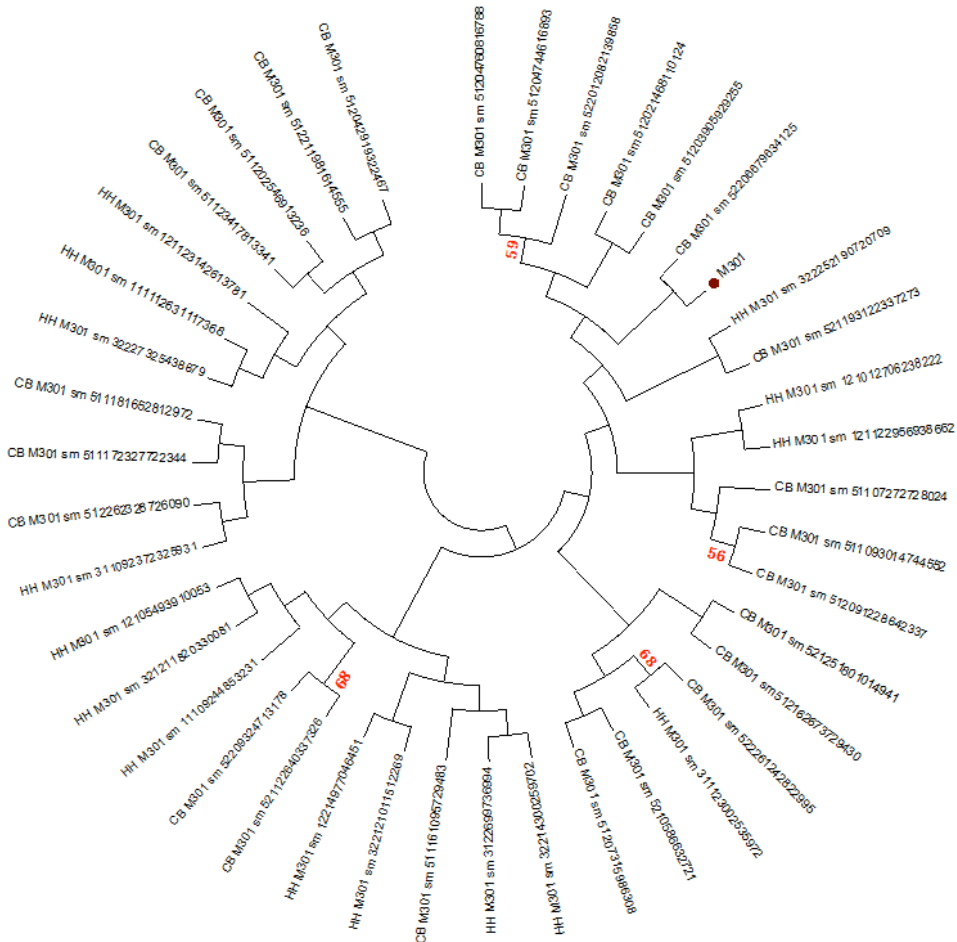

Figure S3

|                            |                |
|----------------------------|----------------|
| M302                       | AREIGDYyyyGMDV |
| CB_M302_sm_511062610848245 | ARENGVyyyGMDV  |
| HH_M302_sm_12124250321447  | AREWGYyyyGMDV  |
| HH_M302_sm_311011389017368 | AREHGHyyyGMDV  |
| HH_M302_sm_121151203314607 | ARESGSyyyGMDV  |
| CB_M302_sm_52101686729466  | ARELGFyyyGMDV  |
| HH_M302_sm_122172396738205 | AREAPFyyyGMDV  |
| HH_M302_sm_11209345721342  | AREAYyyyGMDV   |
| HH_M302_sm_122163110130943 | AREAAHyyyGMDV  |
| HH_M302_sm_311192840228797 | ARESAHyyyGMDV  |
| HH_M302_sm_112191441819056 | AREAASyyyGMDV  |
| HH_M302_sm_1221222508664   | AREPDTyyyGMDV  |
| HH_M302_sm_111212038517579 | AREPDAYyyGMDV  |
| HH_M302_sm_31220181722914  | AREPMGYyyGMDV  |
| HH_M302_sm_312011817232701 | ARELSPyyyGMDV  |
| HH_M302_sm_32221465513359  | ARECIPyyyGMDV  |
| HH_M302_sm_122251814225369 | ARERRAHyyyGMDV |
| HH_M302_sm_312022250633176 | ARERGAYyyGMDV  |
| HH_M302_sm_312122499245467 | AREKGSyyyGMDV  |
| HH_M302_sm_31114984122344  | AREEDGDyyyGMDV |
| HH_M302_sm_312271226642372 | AREGDGAYyyGMDV |
| HH_M302_sm_122052136943304 | AREVWFAYyyGMDV |
| HH_M302_sm_3222828996941   | ARENRSyyyGMDV  |
| HH_M302_sm_12105530440543  | AREELRFyyyGMDV |
| HH_M302_sm_112231057142917 | ARELTRPyyyGMDV |
| HH_M302_sm_322031089628569 | ARELSPyyyGMDV  |
| HH_M302_sm_311272458618423 | AREGTHDyyyGMDV |
| HH_M302_sm_121182204917087 | AREGLHDyyyGMDV |
| HH_M302_sm_112271073416753 | ARELRLKyyyGMDV |
| HH_M302_sm_12112569031787  | AREGLVyyyGMDV  |
| HH_M302_sm_12218191471789  | AREGRSyyyGMDV  |
| HH_M302_sm_311272437339225 | AREGSSyyyGMDV  |
| CB_M302_sm_512201458038363 | AREGDSTyyyGMDV |
| CB_M302_sm_521233008622678 | AREGGSTVLCGMDV |
|                            | ***            |
|                            | ****           |

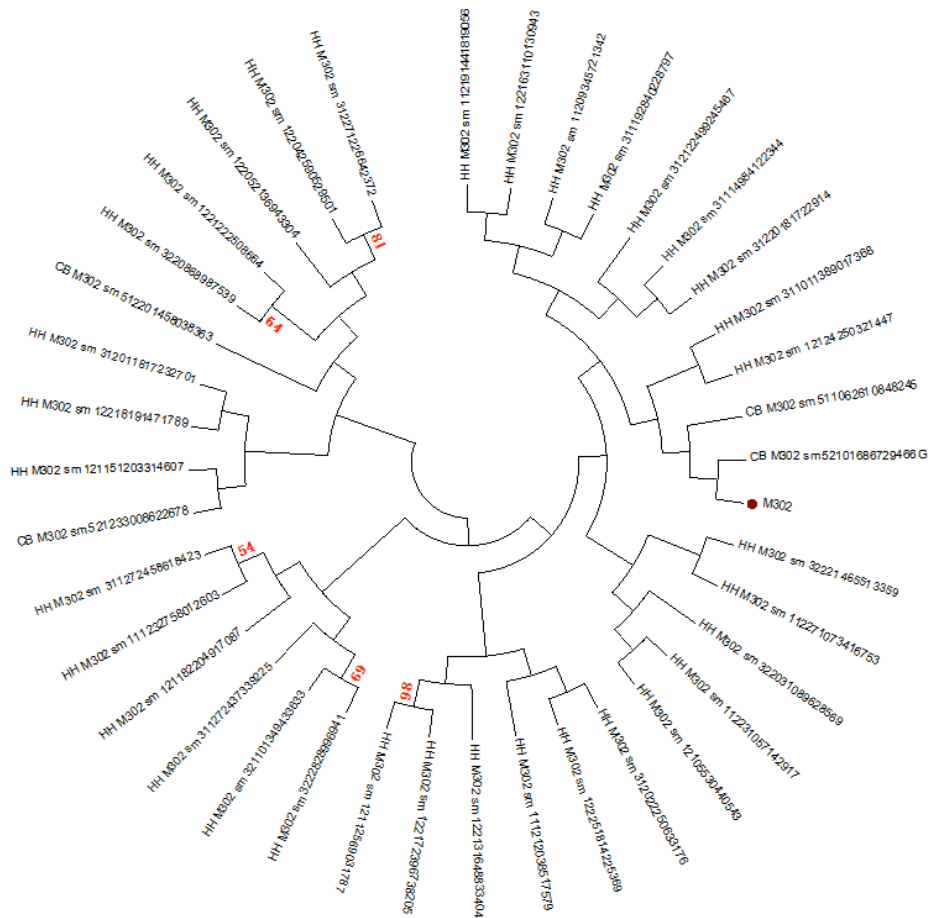

Figure S4

|                           |           |
|---------------------------|-----------|
| M304                      | ARQRGAFDI |
| CB_M304_sm_51221291324842 | ARQRGAFDI |
| CB_M304_sm_52122250734177 | ARERGFADI |
| HH_M304_sm_31205139203655 | ARERGFADI |
| CB_M304_sm_51205130981578 | ARSRGFADI |
| HH_M304_sm_12124231042067 | ARSRGFADI |
| CB_M304_sm_52120171377627 | ARKRGAFDI |
| HH_M304_sm_11110165082971 | ARDRGFADI |
| CB_M304_sm_51203252461211 | ARDRGFADI |
| HH_M304_sm_12105202938066 | ARTRGFADI |
| HH_M304_sm_1110282983108  | ARVRGFADI |
| HH_M304_sm_12219245054275 | ARNRGAFDI |
| HH_M304_sm_32117323902132 | ARIRGFADI |
| CB_M304_sm_51226934342794 | ARARGAFDI |
| HH_M304_sm_12128983119478 | ARARGAFDI |
| HH_M304_sm_11114225162201 | ARGRGFADI |
| CB_M304_sm_51224136973532 | ARGRGFADI |
|                           | ** *****  |

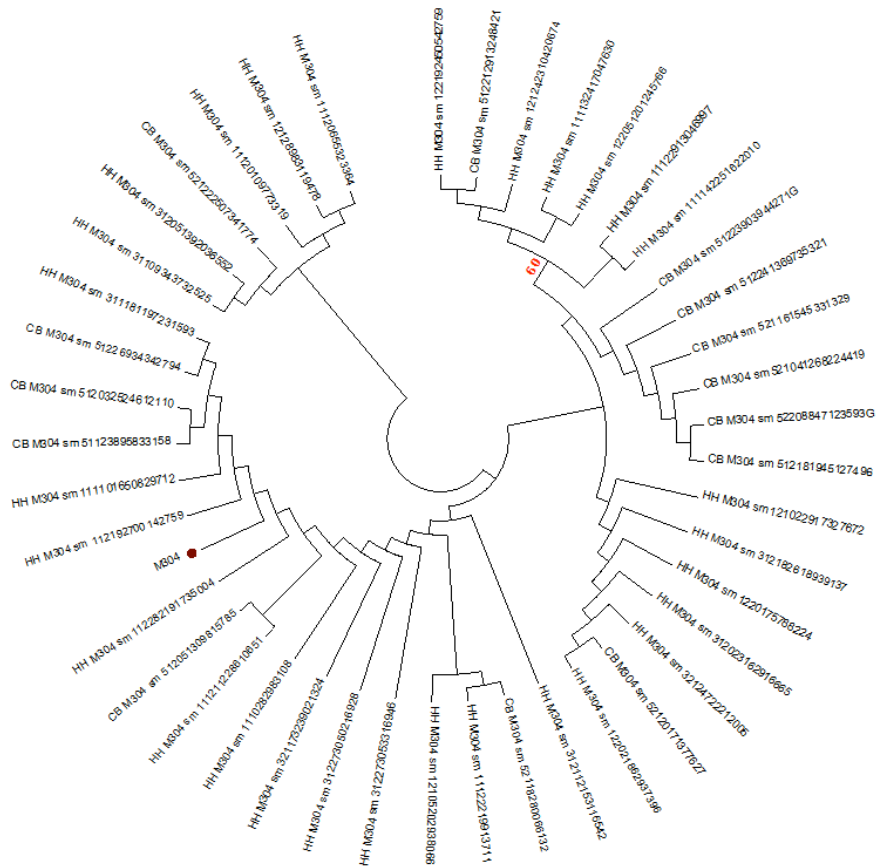

Figure S5

```
m303
CB_M303_sm_522183009721113
CB_M303_sm_51224273674848
CB_M303_sm_521042613915803
CB_M303_sm_52216293766572
CB_M303_sm_51203577126582
HH_M303_sm_111101884226723
HH_M303_sm_11115103285429
VPPSLG--YCSSTSCYP--PS--
--AKYHR-YCSSTSCP--EFDY
--AKELG-YCSSTSCY--AFDY
--ARAG--YCSSTSCPT--PFDY
--ARRG--YCSSTSCYW--DFDY
--ARVGGGYSSTSCY---FDY
--ARVG---CSSTSCYAAGFDY
--ARGD---CSSTSCYVGEFDY
*****
```

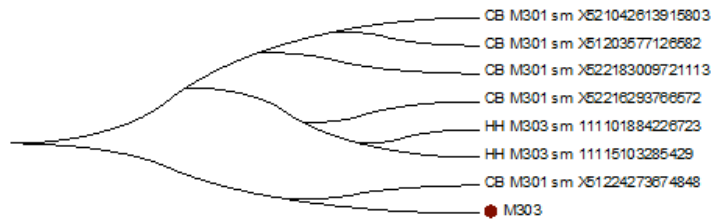

\*CB: data from newborn babies

HH: data from healthy adult donors



**Figure S6**

|                 |                                                                                       |     |     |     |     |     |     |
|-----------------|---------------------------------------------------------------------------------------|-----|-----|-----|-----|-----|-----|
|                 | 303                                                                                   | 310 | 320 | 330 | 340 | 350 | 360 |
| <b>SZ01</b>     | ..... ..... ..... ..... ..... .....                                                   |     |     |     |     |     |     |
| <b>FLR</b>      | VSYSLCTAAFTFTKIPAE <del>T</del> LHGTVTVEVQYAGTDGPKVPAQMAVDMQTLTPVGR <del>L</del> ITAN |     |     |     |     |     |     |
| <b>PAN2015</b>  | -----V-----                                                                           |     |     |     |     |     |     |
| <b>R103451</b>  | -----V-----                                                                           |     |     |     |     |     |     |
| <b>PRVABC59</b> | -----L-----                                                                           |     |     |     |     |     |     |
|                 | 370                                                                                   | 380 | 390 | 400 |     |     |     |
| <b>SZ01</b>     | ..... ..... ..... ..... ..... .....                                                   |     |     |     |     |     |     |
| <b>FLR</b>      | PVITESTENSKMMLELDPPFGDSYIVIGVGEKKITHHWHRSG                                            |     |     |     |     |     |     |
| <b>PAN2015</b>  | -----                                                                                 |     |     |     |     |     |     |
| <b>R103451</b>  | -----                                                                                 |     |     |     |     |     |     |
| <b>PRVABC59</b> | -----                                                                                 |     |     |     |     |     |     |
